# Supplementary material for: Virome of the tabanids from Russia
Source: Preprints.org preprint supplement (doi:10.20944/preprints202310.1978.v1), 2023-10-31
Supplement: Supplementary file 1 [file supplementary]

Table S1. Oligonucleotides used for PCR-detection of the novel viruses.

| **Pool** | **Virus** | **Oligonucleotide name** | **Oligonucleotide sequence** | **Product length** | **Temperature** |
| --- | --- | --- | --- | --- | --- |
| 1 | Xanka Hybomitra Negev-like virus | NegevL-p1_F | GATGCGTTAAAAGAAGCGAA | 310 | 50 |
| Negev_p1_P | (FAM)-ACCGACAAGCCAGTGATACCTGACA-(BHQ-1) |
| NegevL-p1_R | TTGGACAAAACACGGAATTG |
| Razdolnyj Hybomitra Phasma-like virus | Orto_p1_F | TGTTGTTGCTAATGTTCCAC | 308 | 50 |
| Orto_p1_R | ATTCTGATGATTCCTGGGTG |
| 2 | Kamenushka Hybomitra Narna-like virus | Narn_p2_F | CGTTAATCATTTGGCGTTGA | 399 | 50 |
| Narn_p2_P | (FAM)-GCGCACTGAGGACAGTGGCC-(BHQ-1) |
| Narn_p2_R | CCATTTTTGAGGGTTGACAG |
| Volxa Hybomitra Toti-like virus | Toti_p2_F | AACTCGACGATGAATGTGAA | 358 | 50 |
| Toti_p2_P | (FAM)-GCAGCTTGGTATCTGATGGCGCT-(BHQ-1) |
| Toti_p2_R | GAGAAGTGACTCGTAAGGAC |
| Komarovka Hybomitra Solemo-like virus | Sole_p2_F | CGTGCATTCCCGCTATTTGT | 362 | 55 |
| Sole_p2_P | (FAM)-GCTCCCACTGTGCCTTGAC-(BHQ-1) |
| Sole_p2_R | AGTGATGCCAGCCCATGTTT |
| Barsukovka Hybomitra Ifla-like virus | Ifla_p2_F | TTTGTATTGATCCAGGTGCT | 363 | 52 |
| Ifla_p2_P | (FAM)-ACTTTGAGACCACCCCGCCA-(BHQ-1) |
| Ifla_p2_R | TTTCTGCTATGCCTAAAGGT |
| 3 | Big rock Hybomitra Ifla-like virus | C30_p3_F | TTCTTGCTGCACTAGTATTGA | 252 | 50 |
|  | TGGGTCTGTGTTGGACAATAACACCCA |
| C30_p3_R | GAATTGACTGATGATGCTTCT |
| 6 | Medvezhye Haematopota Flavi-like virus | LFla_p6_F | CCGAAAGTCAAGAAGAATGC | 286 | 50 |
| LFla_p6_R | CTGGATGGTATATGCGTTGA |
| Melisia Haematopota Negev-like virus | NegevL_p6_F | CGTATGTTTGTCATTCGCAA | 261 | 50 |
| NegevL_p6_P | (FAM)-CCATAGGCAGGGCAGTCACA-(BHQ-1) |
| NegevL_p6_R | CAGACCAAAAGGACTCATCA |
| Medvezhye Haematopota Xinmo-like virus | Anphe_p6_F | TTGTTATTATCCCAGGTGCC | 367 | 50 |
| Anphe_p6_R | CGTCCTCTTGGATCTGTTAG |
| Medvezhye pound Haematopota Permuto-like virus | Permu_p6_F | CCCAACGCATATCCTCATTA | 283 | 50 |
| Permu_p6_P | (FAM)-TGCCACGGGATGTTTCAACC-(BHQ-1) |
| Permu_p6_R | GAGCGGACAAATATACCCAT |
| Polka Haematopota Nora-like virus | C191_p6_F | TTTTGGAGGATTTGTGAATGC | 254 | 50 |
| C191_p6_P | (FAM)-GATCCTCACAGCCCGGCGTG-(BHQ-1) |
| C191_p6_R | CCTGAATCTTTCTGGCCTTAT |
| Polka Haematopota Xinmo-like virus | C223_p6_F | TACCAAGTAGGCAACATACC | 270 | 50 |
| C223_p6_R | TGTTTCAGACATGAACTGGT |
| 7 | Medvezhye Chrysops Negev-like virus | NegevL_p7_F | CATTGACCACATCTTGCATC | 400 | 52 |
| NegevL_p7_P | (FAM)-GGCATGTGAAGTGGTAATGGAATC-(BHQ-1) |
| NegevL_p7_R | ACTAAGGAGGGTCTAGTGTC |
| Big Soux River virus (strain Medveje) | BSR_p7_F | TTTAATATGCAACCACGGGA | 274 | 50 |
| BSR_p7_P | (FAM)-TGCGCACTCGTCCCGAATGA-(BHQ-1) |
| BSR_p7_R | TGGTAGAACAGGATTGTGTG |
| Medvezhye Chrysops Solemo-like virus | Sol1_p7_F | TCTTTCTTCAAGATCGGCAA | 326 | 50 |
| Sol1_p7_P | (FAM)-TCTGGGCGGCAGCAACTATG-(BHQ-1) |
| Sol1_p7_R | GGAGAGTCAGCATTGGTTTA |
| Melisia Chrysops Solemo-like virus | Sol2_p7_F | ATGATCAAACCGTGTTGAGA | 358 | 50 |
| Sol2_p7_P | (FAM)-AACCATTTGCCACAAGATCTGTAA-(BHQ-1) |
| Sol2_p7_R | CAGTGATCAGAGCCTTAGAC |
| Polka Chrysops Solemo-like virus | Sol3_p7_F | AAAGTAAAACCAGGCGTTTG | 268 | 50 |
| Sol3_p7_P | (FAM)-AACTCGAACGATTGATGCGGT-(BHQ-1) |
| Sol3_p7_R | AACTCGATGTATTCTGGCTC |
| Medvezhye Chrysops Narna-like virus | Nar1_p7_F | TTTTCTTCGACATATGGGCA | 255 | 50 |
| Nar1_p7_R | GCTTTGATATCAGATGCTGC |
| Medvezhye Chrysops Narna-like virus 2 | Nar2_p7_F | ACAGTGCGAAGTTGTTATCT | 327 | 50 |
| Nar2_p7_P | (FAM)-CAAATGGCTCGGCTTGGTAGATCG-(BHQ-1) |
| Nar2_p7_R | AGATCGGATAGCTTCGTCTA |
| Medvezhye Chrysops Solinvi-like virus | Soli_p7_F | ACATTGCCTTTTCCATTGTG | 335 | 50 |
| Soli_p7_R | AAAAGTTAGGCGTGACAGAT |
| Medvezhye Chrysops Rhabdo-like virus | Rha_p7_F | AGAGGCTCTCACTGACAATA | 292 | 50 |
| Rha_p7_P | (FAM)-TGGCTGACGGATCTGAGATCCCT-(BHQ-1) |
| Rha_p7_R | CCCTCCTAAATGTCCTTTCC |
| 8 | Medvezhye Chrysops Ifla-like virus | Ifla_p8_F | CATAAGAAGCATAACGACGC | 350 | 50 |
| Ifla_p8_P | (FAM)-ACGATCTCCCGATTTCATCCATTCTGA-(BHQ-1) |
| Ifla_p8_R | TGTGATGTGTCCTTACTTCG |
| Medvezhye Chrysops Toti-like virus | Toti_p8_F | TGGTAACATCCAGTTCACAG | 387 | 50 |
| Toti_p8_P | (FAM)-TGCCGCTATGGGGGAGGCAT-(BHQ-1) |
| Toti_p8_R | TTTTCCGCCGTTATAGGTAG |
| Istie Chrysops Solemo-like virus | Sole_p8_F | ATTCCAATTCCGAGTCAACA | 268 | 50 |
| Sole_p8_P | (FAM)-AGTTGGGTAATTTCGGGGTCTTGGA-(BHQ-1) |
| Sole_p8_R | CGACCCTCCAAAAGTAAAGA |
| Medvezhye Chrysops Xinmo-like virus | Rha_p8_F | GTTCAAGCTTAGGGGTTACA | 255 | 50 |
| Rha_p8_P | (FAM)-TCACGCACATGGTACAGATGCAA-(BHQ-1) |
| Rha p8_R | TATGTGATGCCAGTACGTTT |
| Medvezhye Chrysops Phasma-like virus | Orto_p8_F | GCATGCACTCATAGATGTTG | 260 | 50 |
| Orto_p8_R | GTGACTGGATTATCAACGGA |
| 9 | Medvezhye Tabanus Phasma-like virus | Orto_p9_F | ACTACAAGTTTAGGTGCCAG | 370 | 50 |
| Orto_p9_R | ATGATGTGTTAACTGCTGGT |
| Medvezhye Tabanus Chu-like virus | Rha_p9_F | TCACTTAAAGTTGCGGATGA | 334 | 50 |
| Rha_p9_R | TTACAACTTATGGACACGCA |
| Medvezhye Tabanus Toti-like virus | Toti_p9_F | AGTCTTAGCCTATACAGCCA | 353 | 50 |
| Toti_p9_P | (FAM)-TCCTCCATGCCCGGCTTGAGT-(BHQ-1) |
| Toti_p9_R | TGATTAGGCCACATGTGAAA |

Table S2. Oligonucleotides used for internal control Poliovirus RT-qPCR.

| Oligonucleotide | Sequence |
| --- | --- |
| PVR1 | 5’-CGAACGTGATCCTGAGTGTT-3’ |
| PVP1 | (ROX)-TTGATTCATGAATTTCCTTCATTGGCA-(BHQ-2) |
| PVL1 | 5’- GGCAGACGAGAAATACCCAT- 3’ |

Table S3. Characteristics of viruses with complete and partial coding sequences.

| **Pool** | **Virus** | **Presence in the pool (%)** | **Comparison protein** | **Closest relative** | **Q cover** | **Identity** |
| --- | --- | --- | --- | --- | --- | --- |
| 1 | Xanka Hybomitra Negev-like virus | 0.01 | ORF1 (RdRp) | [URQ09136.1] Halyomorpha halys negev-like virus 1 | 61% | 42.2% |
| 2 | Kamenushka Hybomitra Narna-like virus | <0.01% | RdRp | [QVG74774.1] Riboviria sp. | 89% | 52.5% |
| Volxa Hybomitra Toti-like virus | 0.01 | RdRp | [UPT53761.1] Bactrocera zonata toti-like virus | 99% | 41.1% |
| Komarovka Hybomitra Solemo-like virus | <0.01% | RdRp | [UJG28005.1] Ulaatai Melophagus solemo-like virus | 75% | 63.6% |
| CP | [APG75767.1] Hubei sobemo-like virus 48 | 93% | 52.7% |
| 6 | Medvezhye Haematopota Flavi-like virus | 0.29 | Polyprotein | [QTJ63573.1] Orthopteran flavi-related virus | 15% | 41.7% |
| Melisia Haematopota Negev-like virus | 0.23 | ORF1 (RdRp) | [URQ09136.1] Halyomorpha halys negev-like virus 1 | 61% | 39.2% |
| Medvezhye Haematopota Xinmo-like virus | 0.18 | RpRp | [YP_009337182.1] Hubei diptera virus 11 | 98% | 35.9% |
| Medvezhye pound Haematopota Permuto-like virus | 0.03 | Polyprotein | [WKV34304.1] Riboviria sp. | 61% | 35.8% |
| 7 | Medvezhye Chrysops Negev-like virus | 1.08 | ORF1 (RdRp) | [UPT53679.1] Zeugodacus tau negev-like virus | 73% | 44.3% |
| Big Soux River virus (strain Medvezhye) | 0.48 | ORF1 | [ATI98938.1] Big Sioux River virus | 99% | 99.9% |
| Medvezhye Chrysops Solemo-like virus | 0.13 | RdRp | [YP_009330098.1] Hubei sobemo-like virus 13 | 73% | 51.1% |
| CP | [YP_009342449.1] Wuhan house centipede virus 5 | 99% | 37.7% |
| Melisia Chrysops Solemo-like virus | 0.28 | RdRp | [UCS96389.1] Riboviria sp. | 81% | 55.7% |
| CP | [APG75767.1] Hubei sobemo-like virus 48 | 86% | 52.6% |
| Polka Chrysops Solemo-like virus | 0.05 | RdRp | [QIJ70118.1] Jeffords solemo-like virus | 95% | 39.5% |
| CP | [QHA33885.1] Atrato Sobemo-like virus 3 | 86% | 35.4% |
| Medvezhye Chrysops Narna-like virus | 0.61 | RdRp | [UHR49680.1] Sanya cydistomyia duplonotatay narnavirus 1 | 91% | 51.2% |
| Medvezhye Chrysops Narna-like virus 2 | 0.23 | RdRp | [UHR49680.1] Sanya cydistomyia duplonotatay narnavirus 1 | 92% | 51.4% |
| 8 | Medvezhye Chrysops Ifla-like virus | 0.02 | Polyprotein | [UQJ82152.1] Exitianus exitiosus virus 2 | 95% | 34.5% |
| Medvezhye Chrysops Toti-like virus | 0.03 | RdRp | [YP_009333170.1] Hubei toti-like virus 19 | 98% | 60% |
| Istie Chrysops Solemo-like virus | 0.01 | RdRp | [QXV86400.1] Solemoviridae sp. | 68% | 46.6% |
| CP | [APG75767.1] Hubei sobemo-like virus 48 | 98% | 42.2% |
| Medvezhye Chrysops Xinmo-like virus | 0.01 | L | [YP_009337182.1]Hubei diptera virus 11 | 98% | 39.2% |

Table S4. Characteristics of genome fragments detected in the study.

| Pool | Contig type and assigned name | Contig name | Closest relative | Protein | Q cover | Identity |
| --- | --- | --- | --- | --- | --- | --- |
| 1 | **Orthophasma-like**  Razdolnyj Hybomitra Phasma-like virus | NODE_8_length_1310_ | [QXV86665.1] Tibet bird virus 1 | nucleocapsid | 89% | 42.8% |
| NODE_19_length_530_ | [QID77675.1] Pink bollworm virus 2 | RdRp | 100% | 69.3% |
| NODE_21_length_478_ | [YP_009666959.1] Seattle Prectang virus | RdRp | 100% | 46% |
| NODE_22_length_468_ | [UHK03218] Hangzhou zicrona caerulea phasmavirus 1 | RdRp | 99% | 53.3% |
| 2 | **Iflaviridae-like**  Barsukovka Hybomitra Ifla-like virus | NODE_11_length_1234_ | [WEU50803.1] Chrysopa pallens | Polyprotein | 93% | 35.7% |
| NODE_20_length_639_ | [CAF1136435.1] Ceratitis capitata iflavirus 3 | Polyprotein | 96% | 48.4% |
| NODE_21_length_616_ | [UJG27957.1] Khandagaity Melophagus ifla-like virus | Polyprotein | 100% | 36.9% |
| NODE_24_length_577_ | [WEU50803.1] Chrysopa pallens | Polyprotein | 100% | 31.8% |
| NODE_27_length_467_ | [QZZ63343.1] Leuven wasp-associated virus 3 | Polyprotein | 99% | 46.1% |
| NODE_28_length_466_ | [UUG74229.1]XiangYun picorna-like virus 4 | Polyprotein | 79% | 57.6% |
| NODE_37_length_408_ | [UQJ82152.1] Exitianus exitiosus virus 2 | Polyprotein | 100% | 63% |
| 3 | **Iflaviridae-like**  Big rock Hybomitra Ifla-like virus | NODE_30_length_381_ | [CAF1136435] Ceratitis capitata iflavirus 3 | Polyprotein | 98% | 39.6% |
| 6 | **Nora virus-like**  Polka Haematopota Nora-like virus | NODE_191_length_616_ | [ASM93992]Caledonia beadlet anemone Nora virus-like virus 1 | ORF2 | 96% | 42.9% |
| **Xinoviridae-like**  Polka Haematopota Xinmo-like virus | NODE_223_length_580_ | Hubei diptera virus 11 | RdRp | 97% | 53.6% |
| 7 | **Solinviviridae-like**  Medvezhye Chrysops Solinvi-like virus | NODE_115_length_1354_ | [UHK03205.1] Hangzhou Solinvi-like virus 2 | Polyprotein | 99% | 38% |
| NODE_146_length_1248_ | [UHK03205.1] Hangzhou Solinvi-like virus 2 | Polyprotein | 99% | 72% |
| NODE_267_length_903_ | [UHK03205.1] Hangzhou Solinvi-like virus 2 | Polyprotein | 99% | 68.6% |
| NODE_312_length_849_ | [UHK03205.1] Hangzhou Solinvi-like virus 2 | Polyprotein | 100% | 75.5% |
| NODE_382_length_787_ | [UHK03205.1] Hangzhou Solinvi-like virus 2 | Polyprotein | 99% | 74.2% |
| NODE_574_length_664_ | [UHK03205.1] Hangzhou Solinvi-like virus 2 | Polyprotein | 100% | 75.1% |
| NODE_617_length_640_ | [UHK03205.1] Hangzhou Solinvi-like virus 2 | Polyprotein | 100% | 46.5% |
| 7 | **Rhabdo-like**  Medvezhye Chrysops Rhabdo-like virus | NODE_9_length_4303_ | [AJG39162.1] Wuhan Fly Virus 3 | L | 99% | 36.8% |
| 7 | **Rhabdo-like**  Melisia Chrysops Rhabdo-like virus | NODE_120_length_1338_ | [YP_009336837.1] Hubei lepidoptera virus 2 | L | 95% | 46.6% |
| NODE_12_NODE_108_ | [UZC34538.1] jopcycgri virus 1 | L | 99% | 50% |
| 8 | **Orthophasma-like**  Medvezhye Chrysops Phasma-like virus | NODE_16_length_3720 | [QXV86663.1]Tibet bird virus 1 | RdRp | 99% | 52% |
| NODE_43_length_2382_ | [YP_010086190.1] Anopheles triannulatus orthophasmavirus | Glycoprotein | 90% | 29.4% |
| NODE_163_length_1495_ | [QXV86665.1]Tibet bird virus 1 | N | 69% | 39.1% |
| NODE_299_length_1184_ | [QXV86663.1]Tibet bird virus 1 | RdRp | 99% | 31.5% |
| 8 | Solinviviridae-like | NODE_2118_length_528_ | [UHK03205.1]Hangzhou Solinvi-like virus 2 | Polyprotein | 67% | 82.4% |
| NODE_3267_length_436_ | [UHK03205.1]Hangzhou Solinvi-like virus 2 | Polyprotein | 99% | 70.8% |
| NODE_4305_length_385_ | [UHK03205.1]Hangzhou Solinvi-like virus 2 | Polyprotein | 99% | 50.8% |
| 9 | **Orthophasma-like**  Medvezhye Tabanus Phasma-like virus | NODE_10_length_1088_ | [QXV86665.1] Tibet bird virus 1 | N | 97% | 38.9% |
| NODE_47_length_434_ | [YP_009666982] Ganda bee virus | Glycoprotein | 98% | 37.9% |
| 9 | **Toti-like**  Medvezhye Tabanus Toti-like virus | NODE_20_length_755_ | [YP_009333170.1]Hubei toti-like virus 19 | VP2 | 99% | 67% |
| NODE_24_length_700_ | [YP_009333170.1]Hubei toti-like virus 19 | VP2 | 96% | 79.2% |
| NODE_64_length_393_ | [YP_009333170.1]Hubei toti-like virus 19 | VP2 | 100% | 67.7% |
| NODE_69_length_384_ | [YP_009333169.1]Hubei toti-like virus 19 | VP1 | 100% | 72.4% |
| 9 | **Chu-like**  Medvezhye Tabanus Chu-like virus | NODE_19_length_798_ | [YP_010798609.1] megalopteran chu-related virus 119 | Glycoprotein | 39% | 52.8% |
| NODE_22_length_739_ | [YP_010798611.1] megalopteran chu-related virus 119 | RdRp | 97% | 34.8% |
| NODE_25_length_693_ | [APG78769.1] Hubei chuvirus-like virus 4 | RdRp | 99% | 48.3% |
| NODE_35_length_520_ | [YP_010798611.1] megalopteran chu-related virus 119 | RdRp | 100% | 32.4% |
| NODE_36_length_509_ | [YP_010798611.1] megalopteran chu-related virus 119 | RdRp | 98% | 54.5% |

Table S5. Similarity estimation within tabanid negev-like viruses using discontiguous megablast on the full genome.

|  | Xanka Hybomitra Negev-like virus | Medvezhye Chrysops Negev-like virus |
| --- | --- | --- |
| Xanka Hybomitra Negev-like virus | - | 68.9% (51% Q cover) |
| Melisia Haematopota Negev-like virus | 70.1% (57% Q cover) | 71.2% (68% Q cover) |

Table S6. Similarity estimation within tabanid xinmo-like sequences using L protein amino acid sequence.

|  | Medvezhye Haematopota Xinmo-like virus | NODE_223_length_580_ |
| --- | --- | --- |
| Medvezhye Haematopota Xinmo-like virus | - | 57.2% (97% cover) |
| Medvezhye Chrysops Xinmo-like virus | 60.1% (98% cover) | 52.9% (98% cover) |

Table S7. Similarity estimation within tabanid ifla-like sequences using polyprotein amino acid sequence.

| Pool | Contig Name | Query cover to the GenBank Entry | Identity to the GenBank Entry | Query cover to Medvezhye Chrysops Ifla-like virus | Identity to the Medvezhye Chrysops Ifla-like virus |
| --- | --- | --- | --- | --- | --- |
| 2 | NODE_11_length_1234_ | 93% | 35.7% | 93% | 50.0% |
| NODE_20_length_639_ | 96% | 48.4% | 99% | 59.3% |
| NODE_21_length_616_ | 100% | 36.9% | 99% | 43.4% |
| NODE_24_length_577_ | 100% | 31.8% | 100% | 35.0% |
| NODE_27_length_467_ | 99% | 46.1% | 99% | 54.5% |
| NODE_28_length_466_ | 79% | 57.6% | 79% | 59.6% |
| NODE_37_length_408_ | 100% | 63% | 100% | 72.5% |
| 3 | NODE_30_length_381_ | 98% | 39.6% | 98% | 79.9% |

Table S8. Similarity estimation within tabanid solinvi-like sequences using polyprotein amino acid sequence.

| Pool 8 contig name | Pool 8 abundance | Pool 7 relative | Q cover | Identity |
| --- | --- | --- | --- | --- |
| NODE_2118_length_528_ | 10 reads | NODE_146_length_1248_ | 35% | 99.5% |
| NODE_3267_length_436_ | 3 reads | NODE_312_length_849_ | 93% | 99.0% |
| NODE_4305_length_385_ | 5 reads | NODE_146_length_1248_ | 99% | 96.9% |

Table S9. Similarity estimation of pool 1 orthophasma-like contig with orthophasma-like sequences from pools 8 and 9 using amino acid sequences.

| Pool 1 contig name | Pool 8 relative | Q cover | Identity | Pool 9 relative | Q cover | Identity |
| --- | --- | --- | --- | --- | --- | --- |
| NODE_8_length_1310_ | NODE_163_length_1495_ | 85% | 46.3% | NODE_10_length_1088_ | 89% | 62.6% |
| NODE_19_length_530_ | NODE_16_length_3720_ | 100% | 77.3% | no | - | - |
| NODE_21_length_478_ | NODE_16_length_3720_ | 100% | 56.2% | no | - | - |
| NODE_22_length_468_ | NODE_16_length_3720_ | 99% | 58.4% | no | - | - |

Table S10. Similarity estimation of pool 9 orthophasma-like contig with orthophasma-like sequences from pools 8 and 1 using amino acid sequences.

| Pool 9 contig name | Pool 8 relative | Q cover | Identity | Pool 1 relative | Q cover | Identity |
| --- | --- | --- | --- | --- | --- | --- |
| NODE_10_length_1088_ | NODE_163_length_1495_ | 86 | 45.9% | NODE_8_length_1310_ | 93% | 62.6% |
| NODE_47_length_434_ | NODE_43_length_2382_ | 98 | 42.0% | no | - | - |


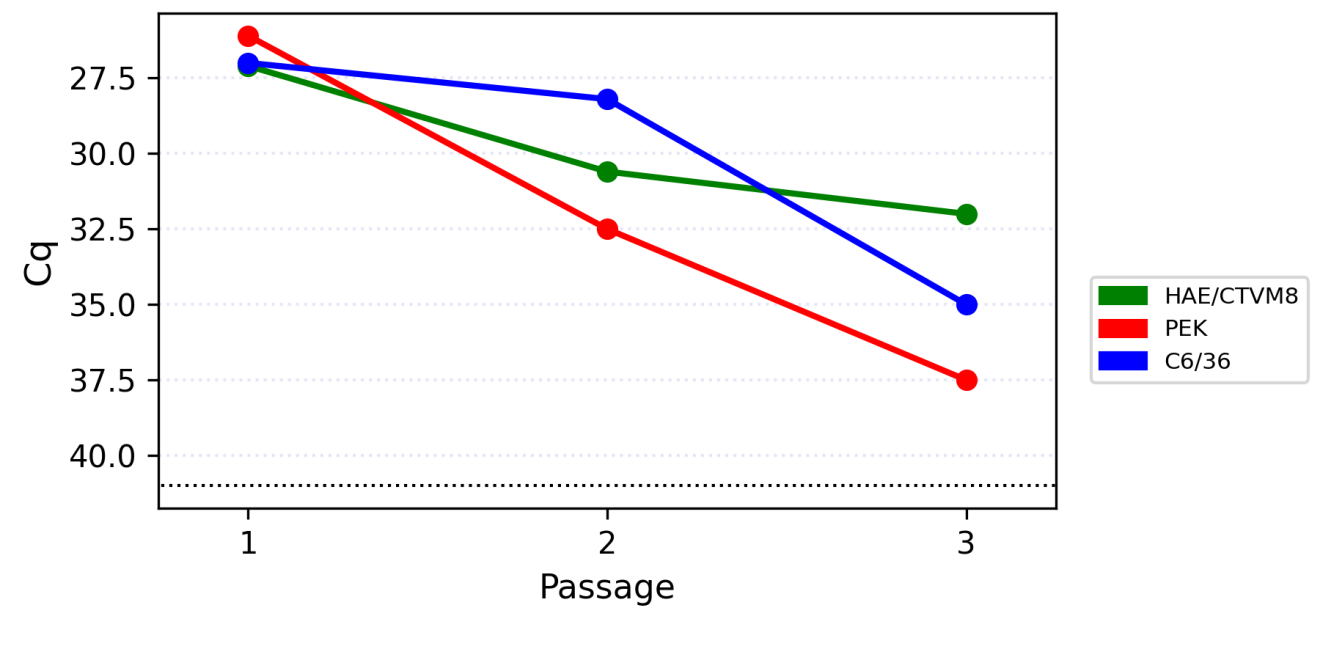
Figure S1. Dynamic of the real-time quantification cycle (Cq) during passages of the Xanka Hybomitra negev-like virus. Black dotted line represents qPCR detection limit (41 cycles).


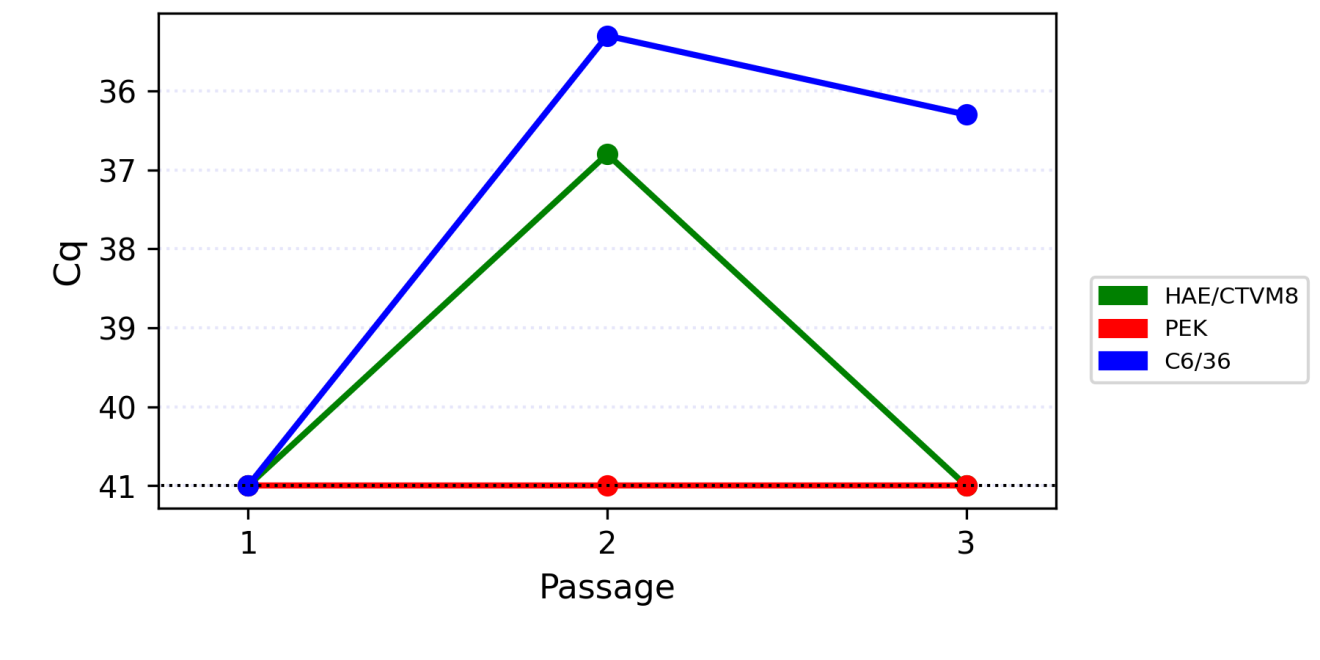


Figure S2. Dynamic of the real-time quantification cycle (Cq) during passages of the Volxa Hybomitra toti-like virus. Black dotted line represents qPCR detection limit (41 cycles).


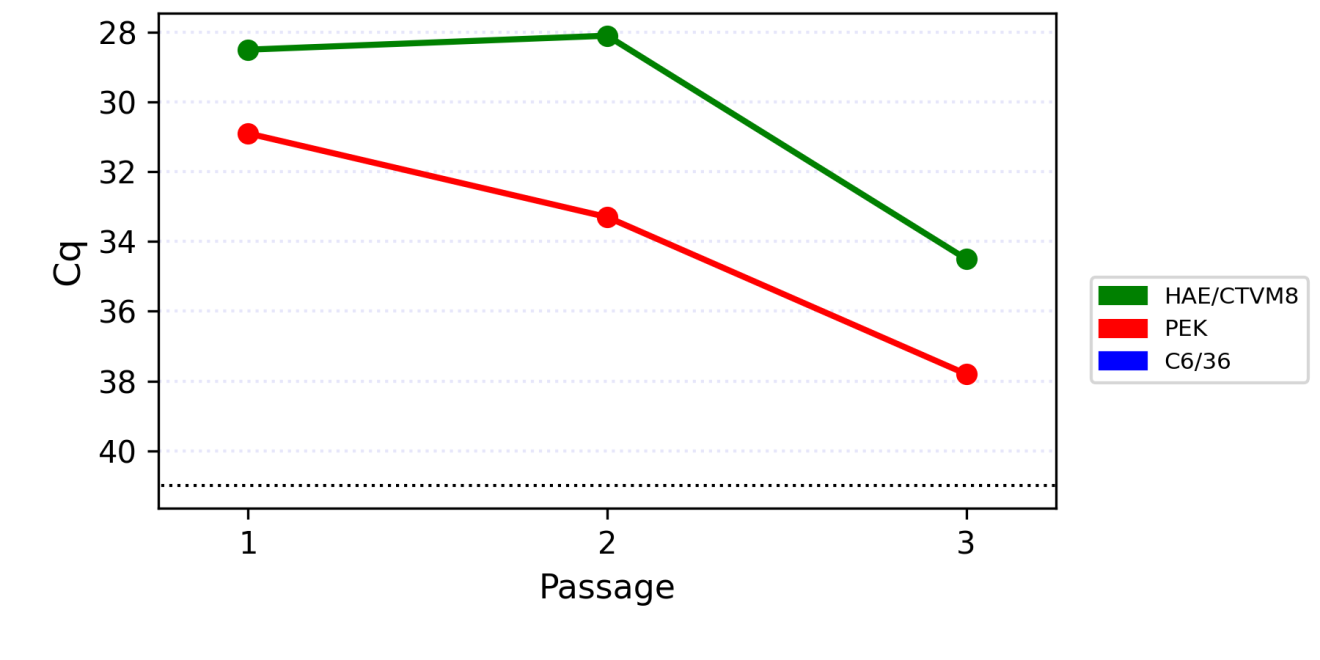


Figure S3. Dynamic of the real-time quantification cycle (Cq) during passages of the Kamenushka Hybomitra narna-like virus. Black dotted line represents qPCR detection limit (41 cycles).


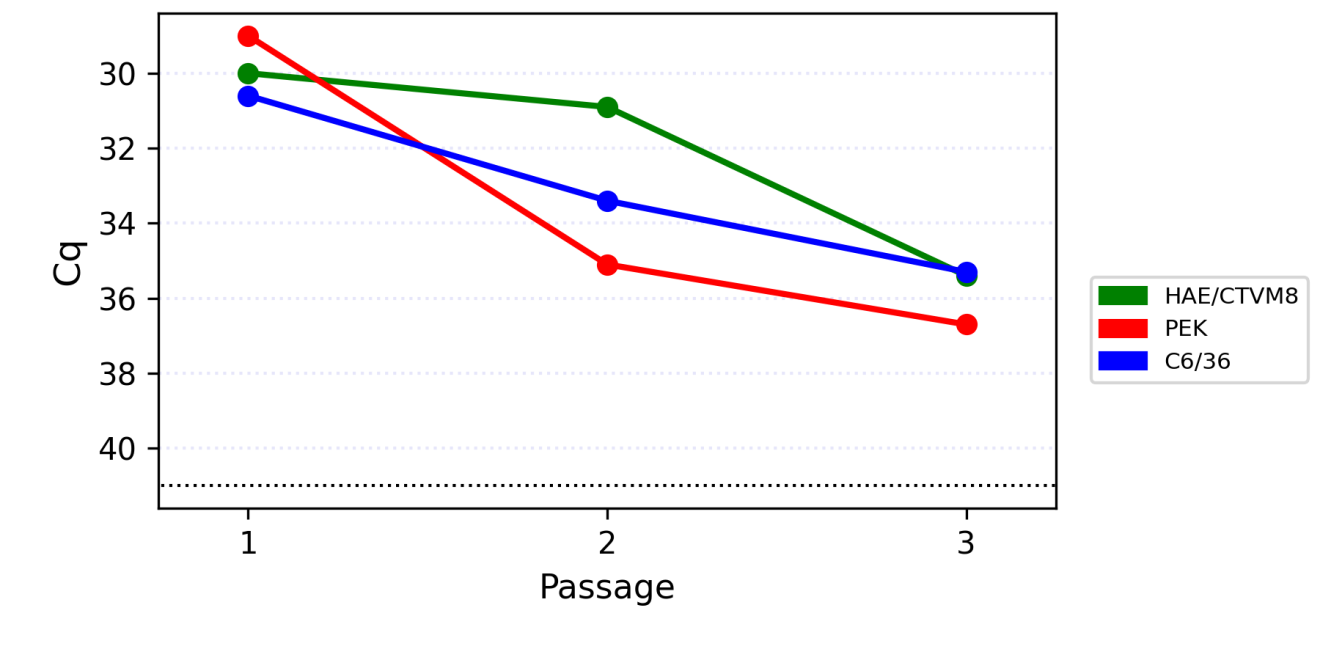
Figure S4. Dynamic of the real-time quantification cycle (Cq) during passages of the Medvezhye pound Haematopota permuto-like virus. Black dotted line represents qPCR detection limit (41 cycles).


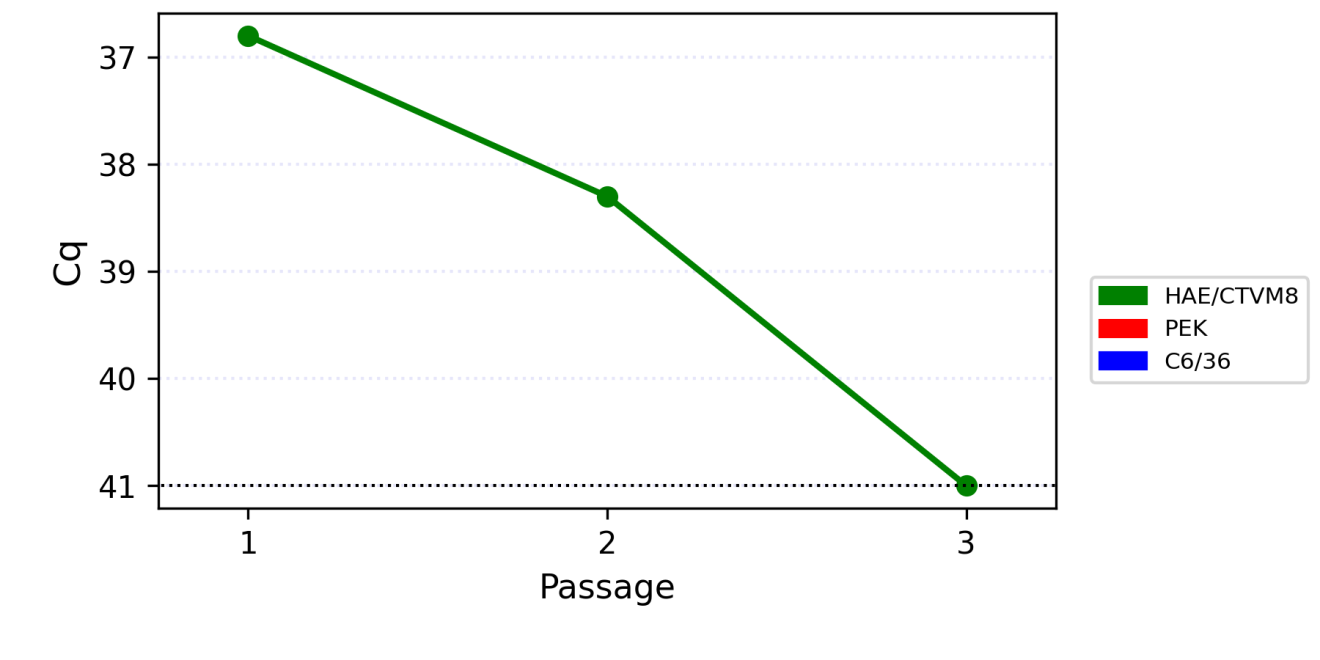


Figure S5. Dynamic of the real-time quantification cycle (Cq) during passages of the Polka Haematopota nora-like virus. Black dotted line represents qPCR detection limit (41 cycles).


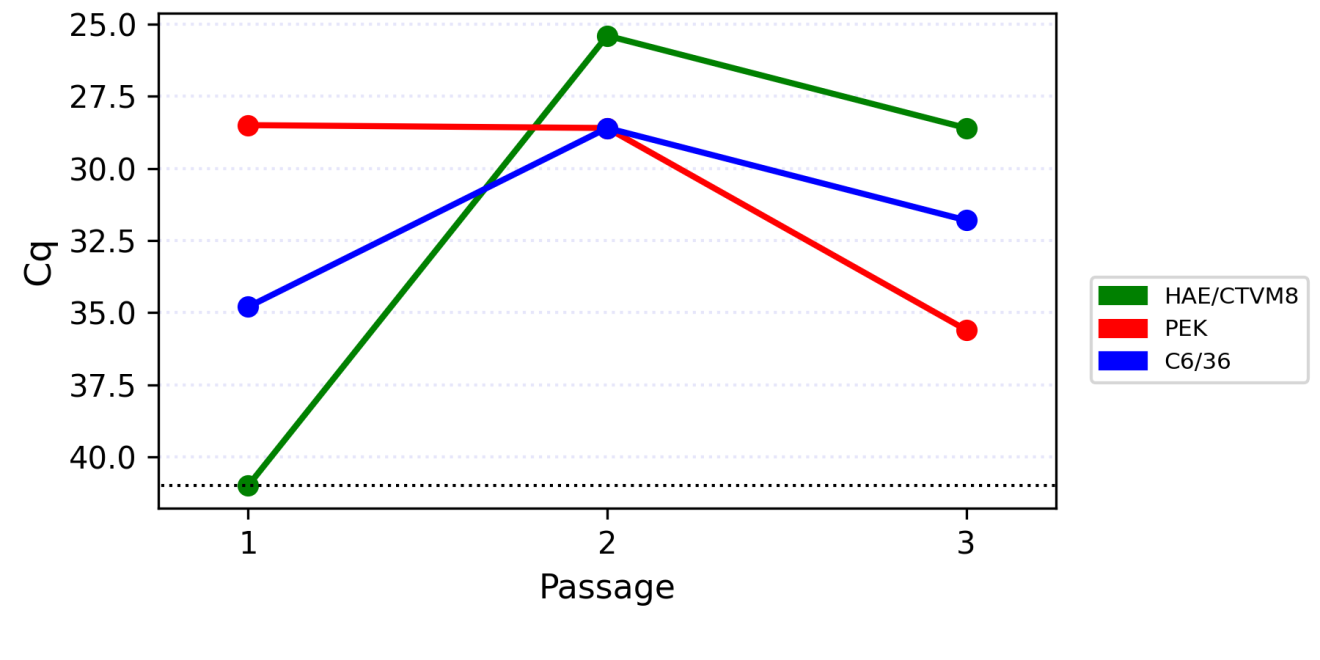
Figure S6. Dynamic of the real-time quantification cycle (Cq) during passages of the Big Soux River virus (strain Medvezhye). Black dotted line represents qPCR detection limit (41 cycles).


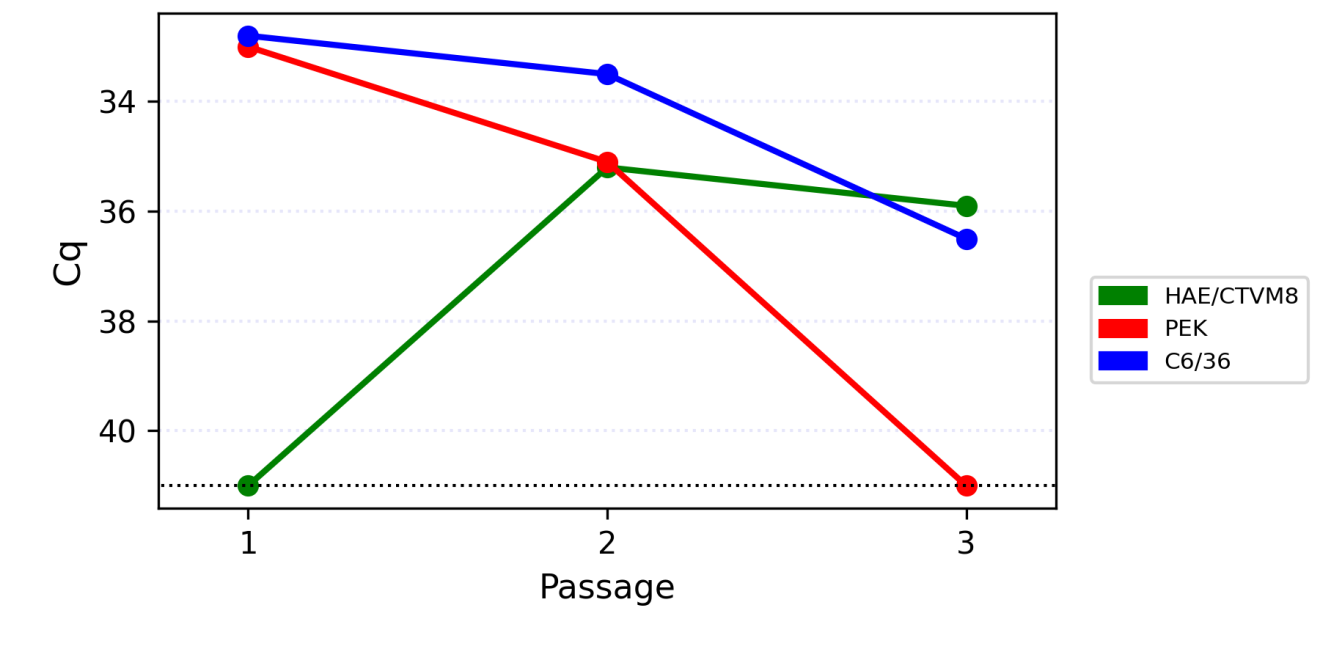


Figure S7. Dynamic of the real-time quantification cycle (Cq) during passages of the Melisia Chrysops solemo-like virus. Black dotted line represents qPCR detection limit (41 cycles).


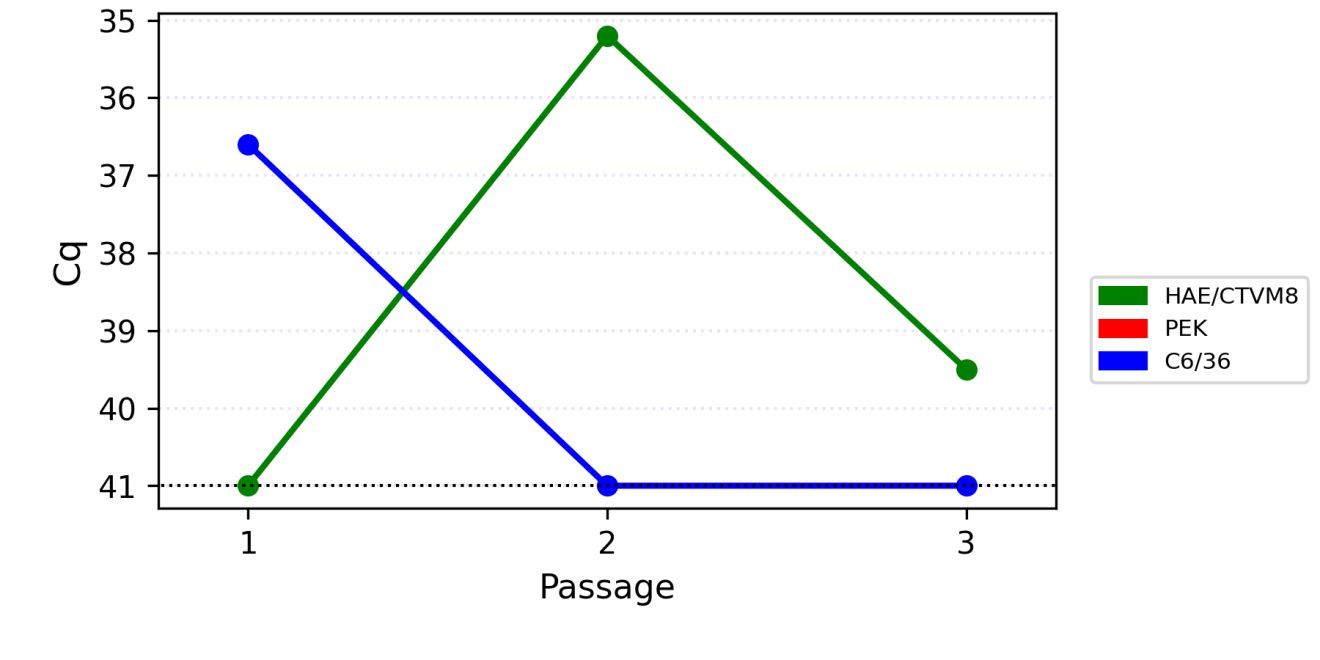


Figure S8. Dynamic of the real-time quantification cycle (Cq) during passages of the Polka Chrysops solemo-like virus. Black dotted line represents qPCR detection limit (41 cycles).


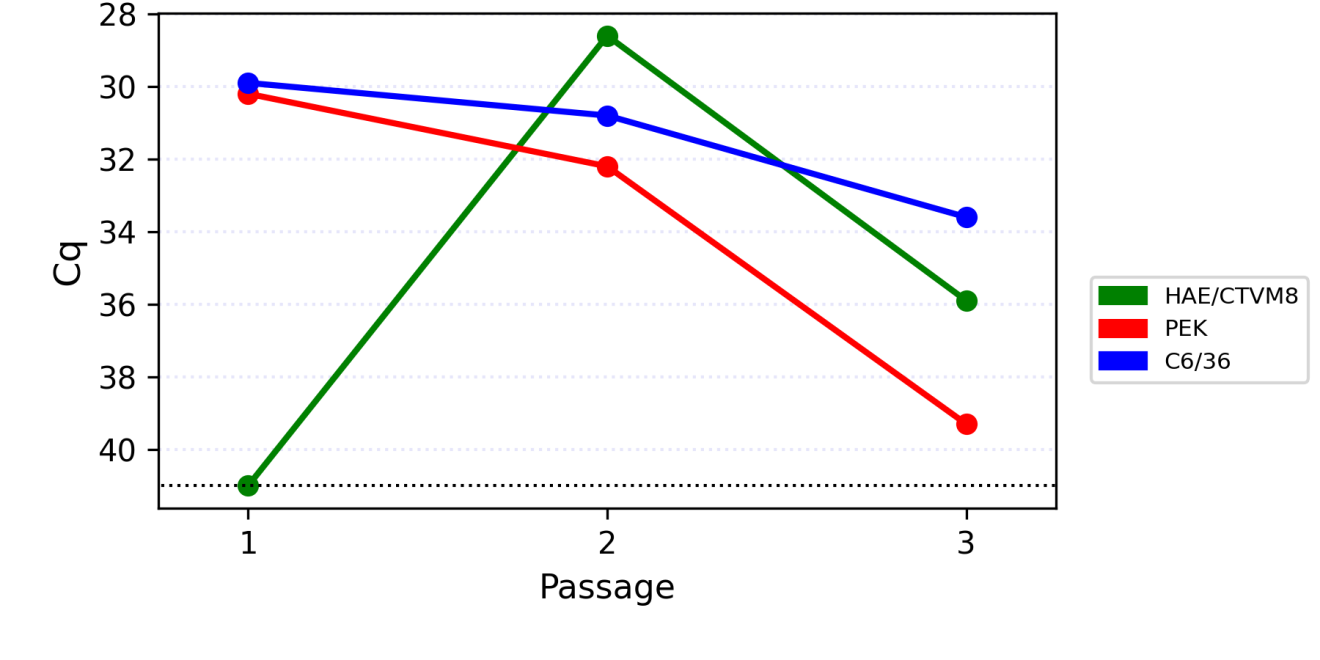


Figure S9. Dynamic of the real-time quantification cycle (Cq) during passages of the Medvezhye Chrysops narna-like virus 2. Black dotted line represents qPCR detection limit (41 cycles).


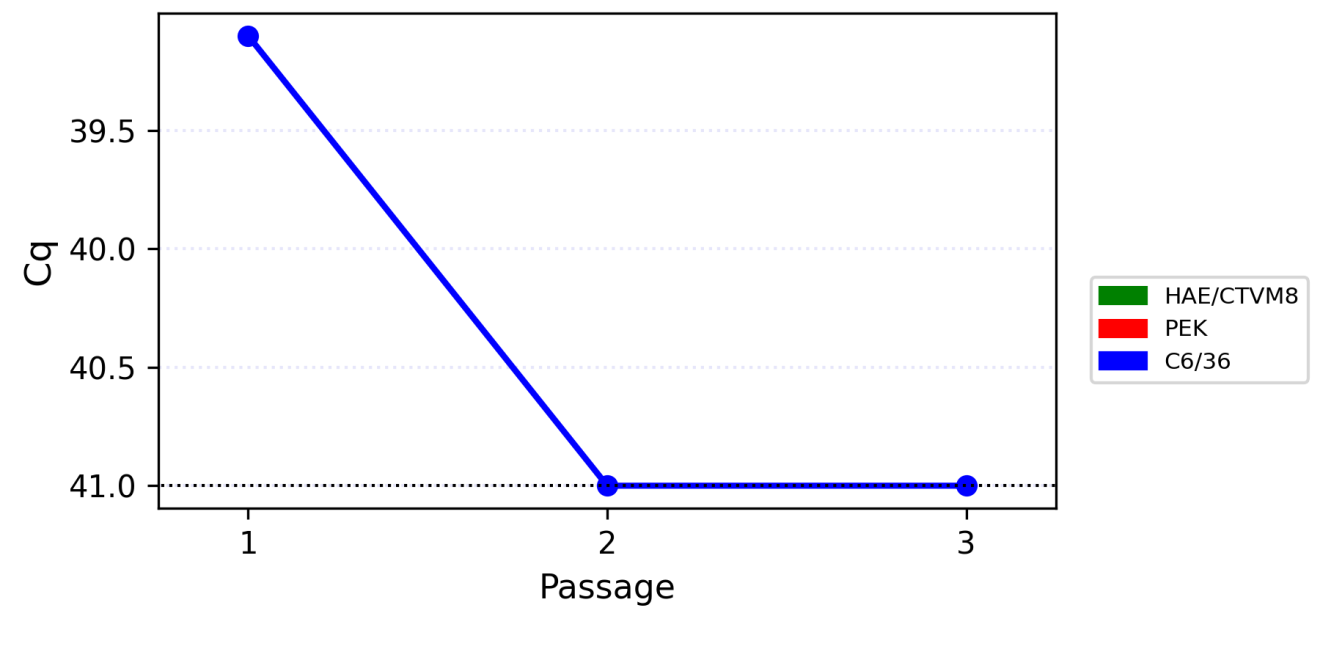
Figure S10. Dynamic of the real-time quantification cycle (Cq) during passages of the Medvezhye Chrysops rhabdo-like virus. Black dotted line represents qPCR detection limit (41 cycles).


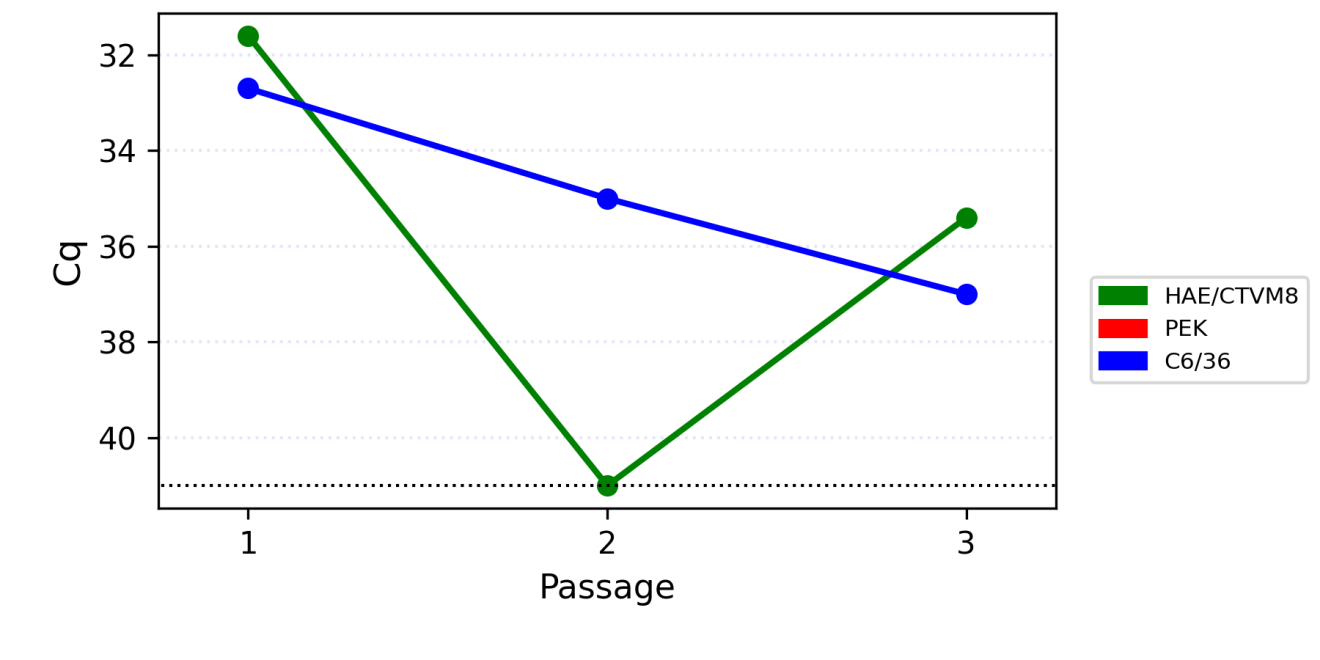
Figure S11. Dynamic of the real-time quantification cycle (Cq) during passages of the Istie Chrysops solemo-like virus. Black dotted line represents qPCR detection limit (41 cycles).


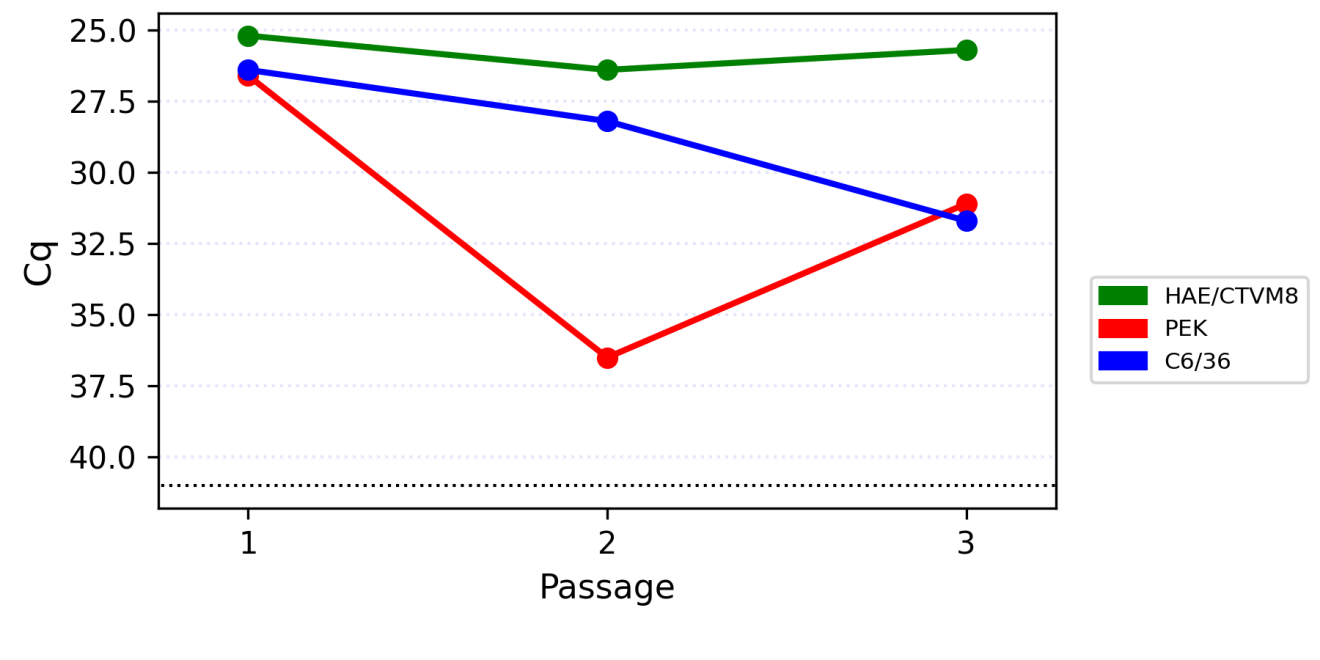
Figure S12. Dynamic of the real-time quantification cycle (Cq) during passages of the Medvezhye Tabanus toti-like virus. Black dotted line represents qPCR detection limit (41 cycles).


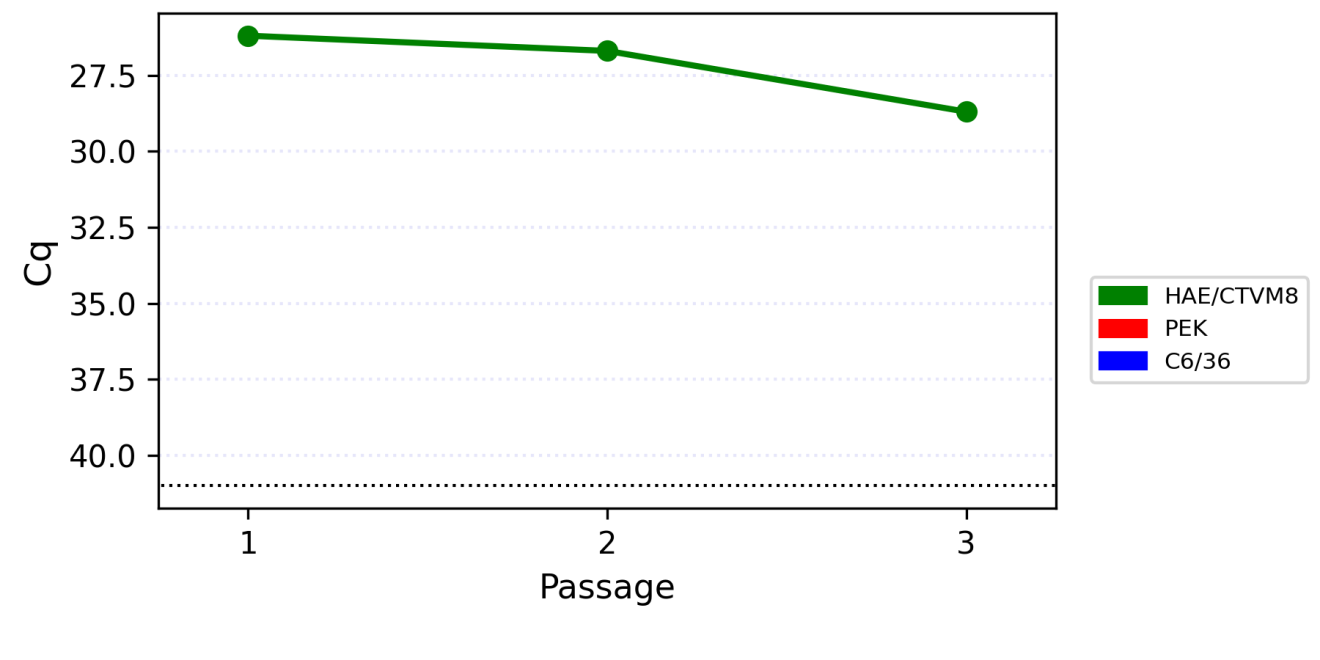


Figure S13. Dynamic of the real-time quantification cycle (Cq) during passages of the Komarovka hybomitra solemo-like virus. Black dotted line represents qPCR detection limit (41 cycles).


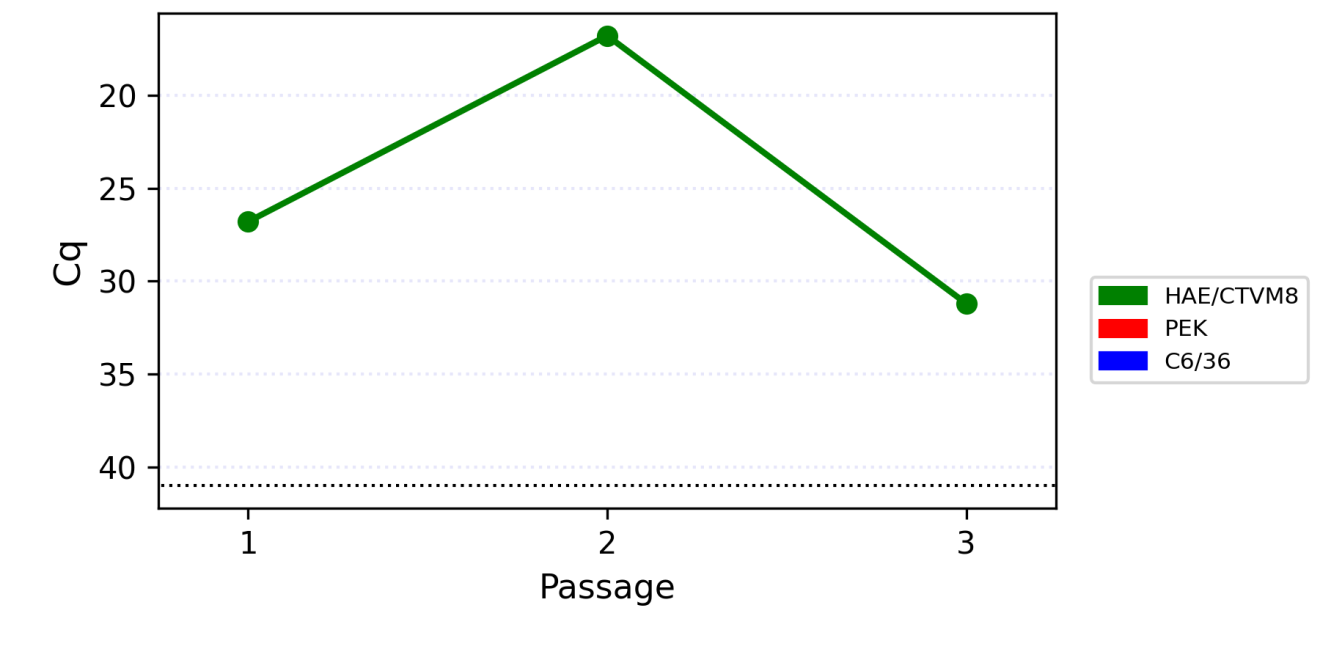


Figure S14. Dynamic of the real-time quantification cycle (Cq) during passages of the Barsukovka Hybomitra ifla-like virus. Black dotted line represents qPCR detection limit (41 cycles).
